# Supplementary material for: Preparation and characterisation of an innovative injectable calcium sulphate based bone cement for vertebroplasty application
Source: Royal Society of Chemistry journal article supplement (doi:10.1039/c6tb02139e), 2016-11-17
Supplement: c6tb02139e1.pdf [file c6tb02139e1.pdf]

## Preparation and characterisation of an innovative injectable calcium sulphate based bone cement for vertebroplasty application

Mehran Dadkhah<sup>1</sup>, Lucia Pontiroli<sup>1,2</sup>, Sonia Fiorilli<sup>1</sup>, Antonio Manca<sup>3</sup>, Francesca Tallia<sup>1,4</sup>,  
IonTcacencu<sup>5</sup>, Chiara Vitale-Brovarone<sup>1,\*</sup>

<sup>1</sup>Department of Applied Science and Technology, Politecnico di Torino, corso Duca degli  
Abruzzi 24, 10129 Torino, Italy

<sup>2</sup>Oral Biology, School of Dentistry, University of Leeds, LS9 7TF Leeds, United Kingdom

<sup>3</sup>Radiology Unit, Istituto di Candiolo – Fondazione del Piemonte per l'Oncologia (FPO),  
IRCCS, Strada Provinciale 142 km 3.95, 10060, Candiolo (Torino), Italy

<sup>4</sup>Department of Materials, Imperial College London, Prince Consort Road, SW7 2BP,  
London, United Kingdom

<sup>5</sup>Department of Dental Medicine, Karolinska Institutet, Huddinge, Sweden

\*Corresponding Author: Tel: +39 011 0904716; E-mail: [chiara.vitale@polito.it](mailto:chiara.vitale@polito.it)

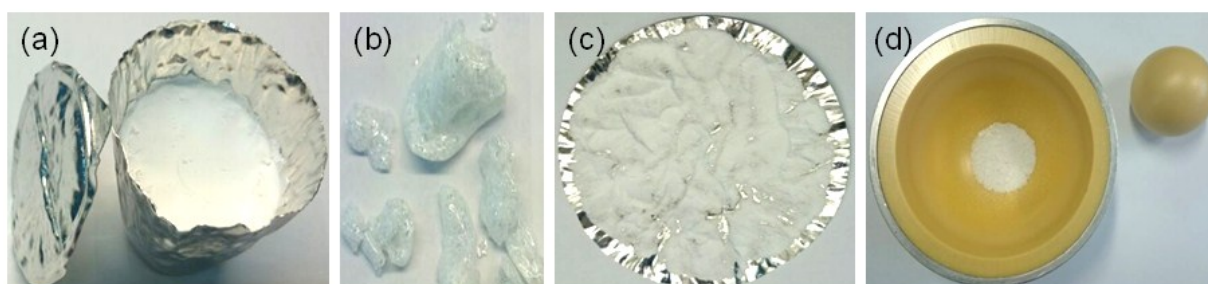

ESI. 1. The preparation sequence of glass-ceramic particles, a) raw precursors before melting, b) frit obtained after casting in water, c) powder ceramisation, d) grinding of the glass particles.

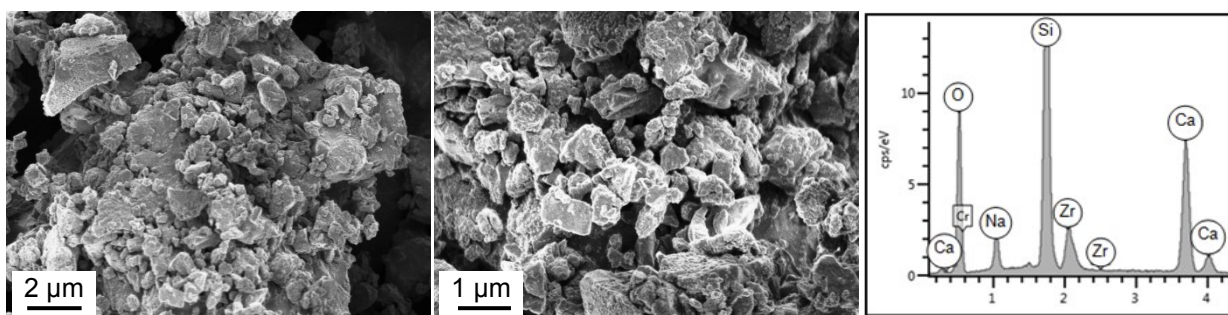

ESI. 2. FESEM images and EDS spectrum of SCNZgc particles.

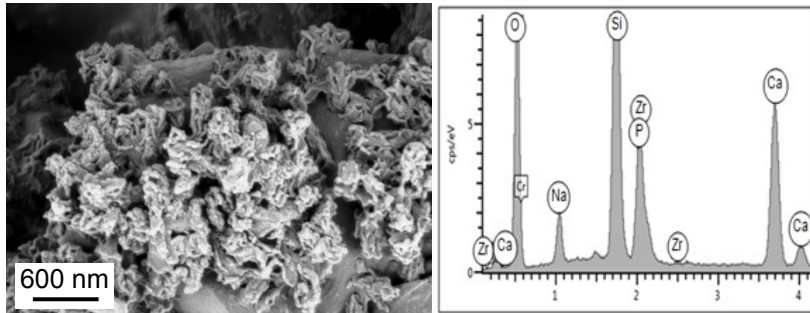

ESI. 3. FESEM images of SCNZgc particles after two weeks of soaking in SBF and related EDS spectrum.

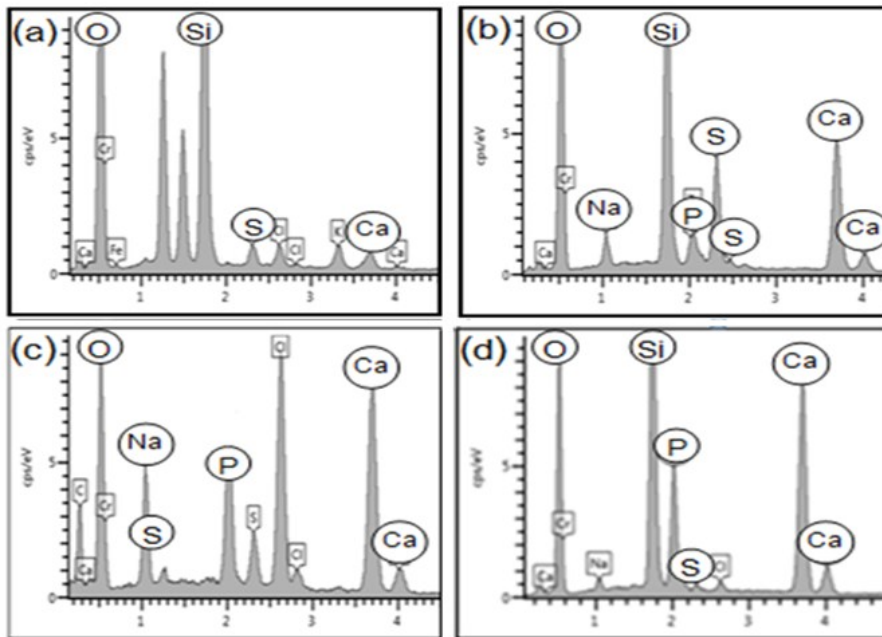

ESI. 4. EDS of calcium sulphate cement (CSC) (a) and Spine-Ghost cement (b) after soaking in SBF for 1 day; CSC (c) and Spine-Ghost cement (d) after soaking in SBF for 7 days.

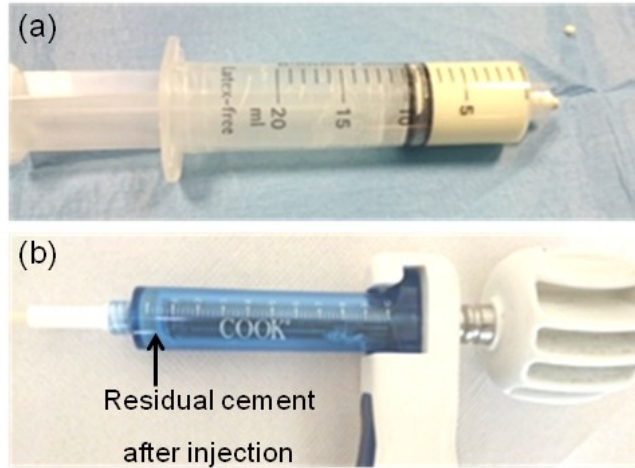

ESI. 5. a) The mixture of Spine-Ghost cement with water ( $L/P = 0.4 \text{ mL/g}$ ) in the syringe before injection, b) the residual amount of Spine-Ghost cement in the DUROJECT syringe after injection (about 0.5 mL).
